# Supplementary material for: The Facile Synthesis of Hollow CuS Microspheres Assembled from Nanosheets for Li-Ion Storage and Photocatalytic Applications
Source: MDPI journal article supplement (doi:10.3390/nano13091505), 2023-04-28
Supplement: s1 [file s1]

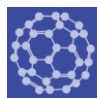

*Supporting Information of*

# The Facile Synthesis of Hollow CuS Microspheres Assembled from Nanosheets for Li-Ion Storage and Photocatalytic Applications

Yiyang Zhao, Yonghui Shao, Hao Chen, Xinwen Luo and Xiaodi Liu \*

College of Chemistry and Pharmaceutical Engineering, Nanyang Normal University, Nanyang 473061, China

\* Correspondence: 20122029@nynu.edu.cn; Tel.: +86-377-63513540

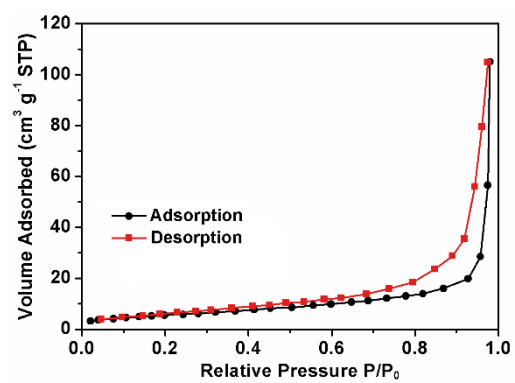

Figure S1. N<sub>2</sub> adsorption-desorption isotherm of S-1.

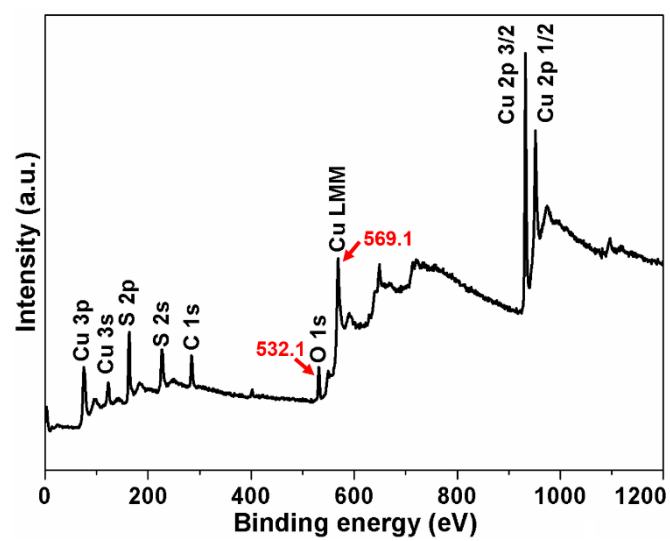

Figure S2. Wide-scan XPS survey of S-1.

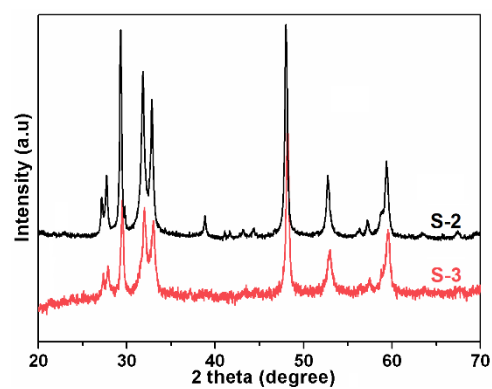

**Figure S3.** XRD patterns of S-2 and S-3.

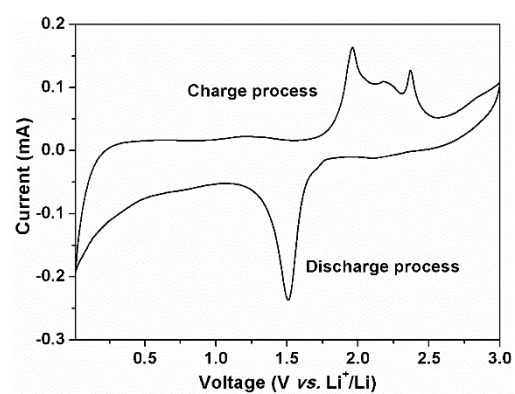

**Figure S4.** CV curve of S-1 at a scan rate of  $0.1 \text{ mV s}^{-1}$ .

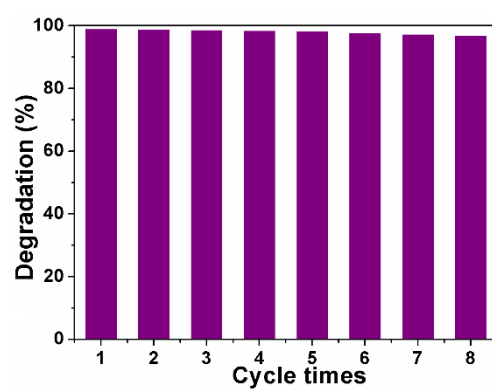

**Figure S5.** The photocatalytic cycling stability of S-1 for the degradation of RhB.

**Table S1.** The detailed experimental conditions and corresponding morphologies of samples.

| Samples | Deionized water (mL) | Glycerol (mL) | Temperature (°C) | Time (h) | Morphology                                  |
|---------|----------------------|---------------|------------------|----------|---------------------------------------------|
| S-1     | 12.5                 | 2.5           | 150              | 9        | Hollow microsphere                          |
| S-2     | 15.0                 | 0.0           | 150              | 9        | Hollow microsphere and irregular aggregates |
| S-3     | 10.0                 | 5.0           | 150              | 9        | Messy aggregates                            |

**Table S2.** The comparison of the electrochemical performance of S-1 and other previously reported copper sulfides-based anodes for LIBs.

| Samples                                    | Discharge capacity                                | Cyclability                                             | Ref.         |
|--------------------------------------------|---------------------------------------------------|---------------------------------------------------------|--------------|
| S-1                                        | 610.1 mAh g <sup>-1</sup> (0.5 C)                 | 196.3 mAh g <sup>-1</sup> /500th (1 C)                  | In this work |
| CuS microspheres                           | 258 mAh g <sup>-1</sup> (0.1 C)                   | ~62 mAh g <sup>-1</sup> /50th (0.1 C)                   | [1]          |
| Tubular dandelion-like CuS superstructures | 500 mAh g <sup>-1</sup> (0.56 A g <sup>-1</sup> ) | 390 mAh g <sup>-1</sup> /10th (0.56 A g <sup>-1</sup> ) | [2]          |
| Sphere-like CuS hierarchical structures    | 590 mAh g <sup>-1</sup> (0.1 A g <sup>-1</sup> )  | 100 mAh g <sup>-1</sup> /10th (0.1 A g <sup>-1</sup> )  | [3]          |
| Cu <sub>x</sub> S/rGO nanocomposites       | 325 mAh g <sup>-1</sup> (0.2 A g <sup>-1</sup> )  | 250 mAh g <sup>-1</sup> /200th (0.2 A g <sup>-1</sup> ) | [4]          |
| Cu <sub>2</sub> S nanoparticle             | 320 mAh g <sup>-1</sup> (0.5 C)                   | 125 mAh g <sup>-1</sup> /50th (1 C)                     | [5]          |
| Cu <sub>2</sub> S/C composite              | ~285 mAh g <sup>-1</sup> (0.5 C)                  | 270 mAh g <sup>-1</sup> /300th (0.2 C)                  | [6]          |

- [1] B. Zhang, X.W. Gao, J.Z. Wang, S.L. Chou, K. Konstantinov, H.K. Liu, CuS nanoflakes, microspheres, microflowers, and nanowires: Synthesis and lithium storage properties, *J. Nanosci. Nanotechnol.*, 2013, 13, 1309-1316.
- [2] Z. Hosseinpour, A. Scarpellini, S. Najafshirvari, S. Marras, M. Colombo, A. Alemi, M.D. Volder, C. George, V. Lesnyak, Morphology-dependent electrochemical properties of CuS hierarchical superstructures, *ChemPhysChem*, 2015, 16, 3418-3424.
- [3] Y. Han, Y. Wang, W. Gao, Y. Wang, L. Jiao, H. Yuan, S. Liu, Synthesis of novel CuS with hierarchical structures and its application in lithium-ion batteries, *Powder Technol.*, 2011, 212, 64-68.
- [4] Y. Zhang, K. Li, Y. Wang, J. Zeng, P. Ji, J. Zhao, Copper sulfide microspheres wrapped with reduced graphene oxide for high-capacity lithium-ion storage, *Mater. Sci. Eng. B*, 2016, 213, 57-62.
- [5] Y. Fu, A. Manthiram, Electrochemical properties of Cu<sub>2</sub>S with ether-based electrolyte in Li-ion batteries, *Electrochim. Acta*, 2013, 109, 716-719.
- [6] F. Han, W.C. Li, D. Li, A.H. Lu, In situ electrochemical generation of mesostructured Cu<sub>2</sub>S/C composite for enhanced lithium storage: Mechanism and material properties, *ChemElectroChem*, 2014, 1, 733-740.



**Table S3.** The comparison of the photocatalytic performance of S-1 and other previously reported metal sulfides for the degradation of organic dyes.

| Samples                                                              | Dye | Dye concentration (mg/L) | Dye volume (mL) | Time (min) | Photodegradation (%) | Ref.         |
|----------------------------------------------------------------------|-----|--------------------------|-----------------|------------|----------------------|--------------|
| S-1 (0.1 g)                                                          | RhB | 10                       | 100             | 21         | 99                   | In this work |
| CuS spherical (0.1 g)                                                | RhB | 2.5                      | 200             | 30         | 90                   | [1]          |
| CdS decorated CuS microflower (0.3 g)                                | MO  | 10                       | 50              | 30         | 91                   | [2]          |
| CuS microflowers (0.05 g)                                            | MB  | 5                        | 30              | 25         | 98                   | [3]          |
| CuS nanoflowers (0.1 g)                                              | MB  | 20                       | 100             | 90         | 39                   | [4]          |
| SnS <sub>2</sub> -RGO composite (0.05 g)                             | RhB | 10                       | 50              | 120        | 100                  | [5]          |
| CdS/ZnS nanocomposites (0.2 g)                                       | RhB | 10                       | 200             | 35         | 96.1                 | [6]          |
| Flower-shaped CuS/Bi <sub>2</sub> WO <sub>6</sub> nanosphere (0.1 g) | RhB | 20                       | 150             | 50         | 90                   | [7]          |

[1] Y. Zhang, B. Zhang, Z. Ge, L. Zhu, Y. Li. Preparation by solvothermal synthesis, growth mechanism, and photocatalytic performance of CuS nanopowders, *Eur. J. Inorg. Chem.*, 2014, 14, 2368-2375.

[2] X. Deng, C. Wang, H. Yang, M. Shao, S. Zhang, X. Wang, M. Ding, J. Huang, X. Xu, One-pot hydrothermal synthesis of CdS decorated CuS microflower-like structures for enhanced photocatalytic properties, *Sci. Rep.*, 2018, 7, 3877.

[3] K. Seo, K. Sinha, E. Novitskaya, O.A. Graeve, Polyvinylpyrrolidone (PVP) effects on iron oxide nanoparticle formation, *Mater. Lett.*, 2018, 25, 203-206.

[4] H. Wu, Y. Li, Q. Li, Facile synthesis of CuS nanostructured flowers and their visible light photocatalytic properties, *Appl. Phys. A*, 2017, 123, 196.

[5] P. Chen, Y. Su, H. Liu, Y. Wang, Interconnected tin disulfide nanosheets grown on graphene for Li-ion storage and photocatalytic applications, *ACS Appl. Mater. Interfaces*, 2013, 5, 12073-12082.

[6] K. Zhang, Ling Jin, Y. Yang, K. Guo, F. Hu, Novel method of constructing CdS/ZnS heterojunction for high performance and stable photocatalytic activity, *J. Photoch. Photobio. A*, 2019, 380, 11859.

[7] H. Zhou, J. Guo, N. Fang, J. Liang, T. Shen, S. Yuan, Investigation of photocatalytic performance of CuS/Bi<sub>2</sub>WO<sub>6</sub> and degradation pathway of RhB in water, *J. Water Supply Res. T.*, 2020, 69, 145-159.
